# Supplementary material for: microRNA-181a has a critical role in ovarian cancer progression through the regulation of the epithelial–mesenchymal transition
Source: PubMed Central journal article supplement — Nat Commun. 2014 Jan 7;5:2977. doi: 10.1038/ncomms3977 (PMC3896774; doi:10.1038/ncomms3977), 2014-01-07
Supplement: ncomms3977-s1.pdf [file ncomms3977-s1.pdf]

**Supplementary Figure S1 Expression of miR-181b in EOC (A)** Kaplan-Meier curves for progression-free survival (PFS) and overall survival (OS) in a cohort of patients (N=52) with stage III primary ovarian serous adenocarcinoma according to relative expression levels of miR-181b. Relative expression levels were dichotomized at the median. Both PFS and overall survival showed divergent Kaplan-Meier curves according to miR-181b status. P-values determined by Log rank statistical test. **(B)** miR-181b expression in patients with PFS<6 months (clinically described as platinum resistant) compared to patients with PFS>6 months (platinum sensitive),  $P=0.19$ , Two-tailed Student *t*-test). (Box and Whiskers plot: min to max) Error bars =s.d.

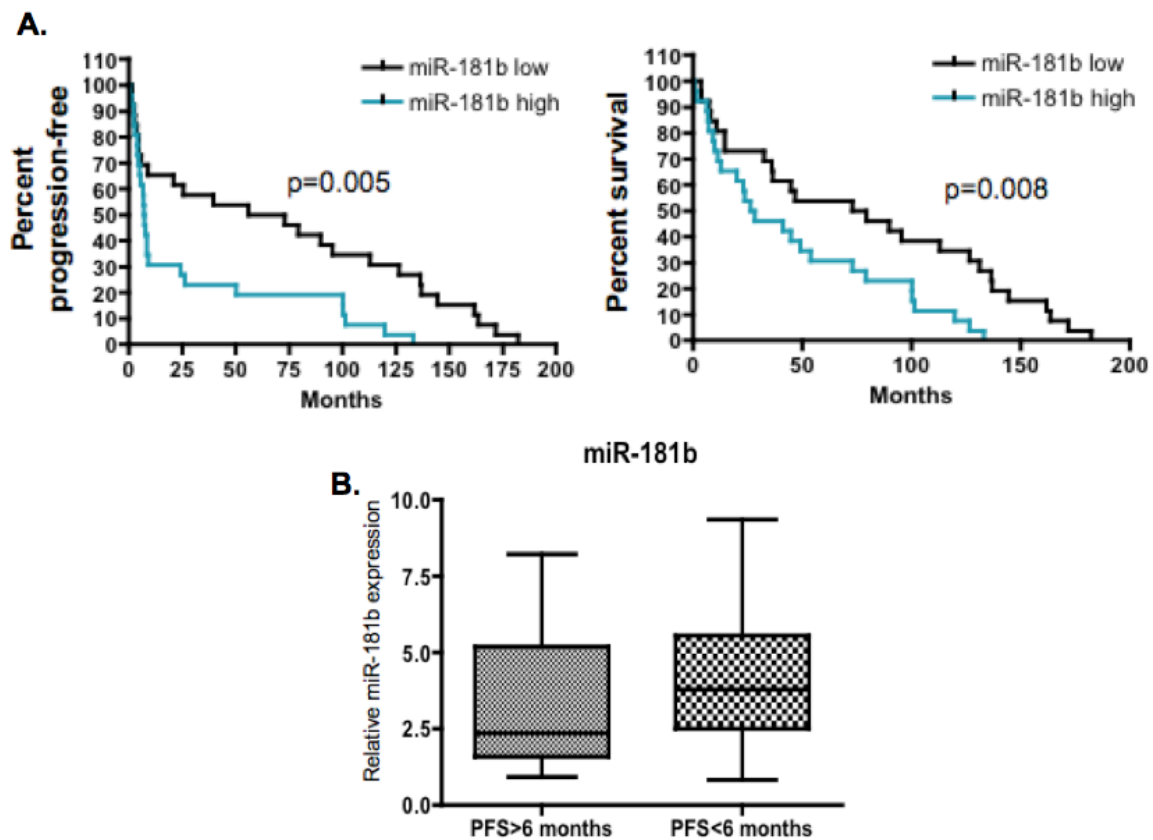

**Supplementary Figure S2 miR-203 and miR-183 expressions in advanced staged epithelial ovarian cancer patient cohort.** Kaplan-Meier survival curve generated from Taqman-based qRT-PCR analysis of miR-203 and -183 expressions in the same patient cohort described in Figure 1. (p-values were calculated using the Log Rank Mantel Cox test)

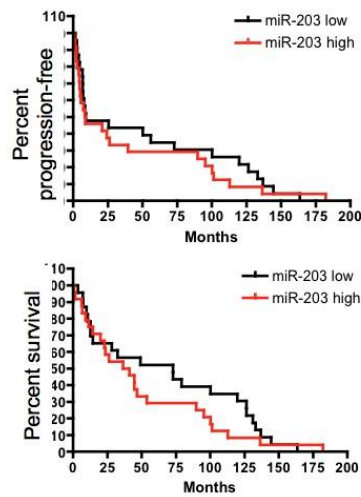

|                                    | miR-203 low | miR-203 high |
|------------------------------------|-------------|--------------|
| Median PFI                         | 9.0         | 8.7          |
| P=0.48, OR 1.0; 95% CI: 0.5 to 1.6 |             |              |
| Median Survival                    | 72.8        | 38.8         |
| P=0.31, OR 1.9; 95% CI: 1.3 to 2.8 |             |              |

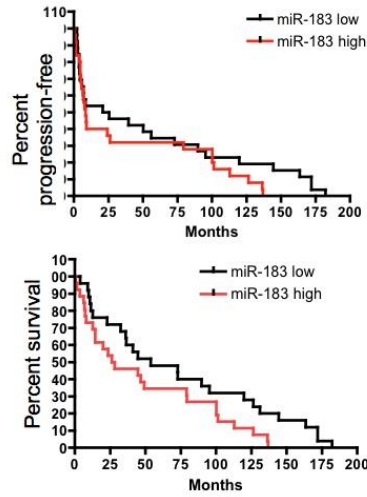

|                                    | miR-183 low | miR-183 high |
|------------------------------------|-------------|--------------|
| Median PFI                         | 23.2        | 8.4          |
| P=0.23, OR 2.8; 95% CI: 2.2 to 3.3 |             |              |
| Median Survival                    | 53.8        | 27.2         |
| P=0.06, OR 2.0; 95% CI: 1.4 to 2.6 |             |              |

### Supplementary Figure S3 Relative expression of miR-181a in primary EOC tumors and cells lines.

In order to determine which EOC cell lines to use for gain- and loss- of function analysis of miR-181a, we directly compared the expression of miR-181a in all patient samples and established EOC cell lines. A2780 (blue bar, "EOC cell lines") represented a relatively low expressing miR-181a cell lines whereas SKOV3 (red bar) represented a high expressing miR-181a cell line therefore gain- and loss- of function assays were performed in these lines respectively.

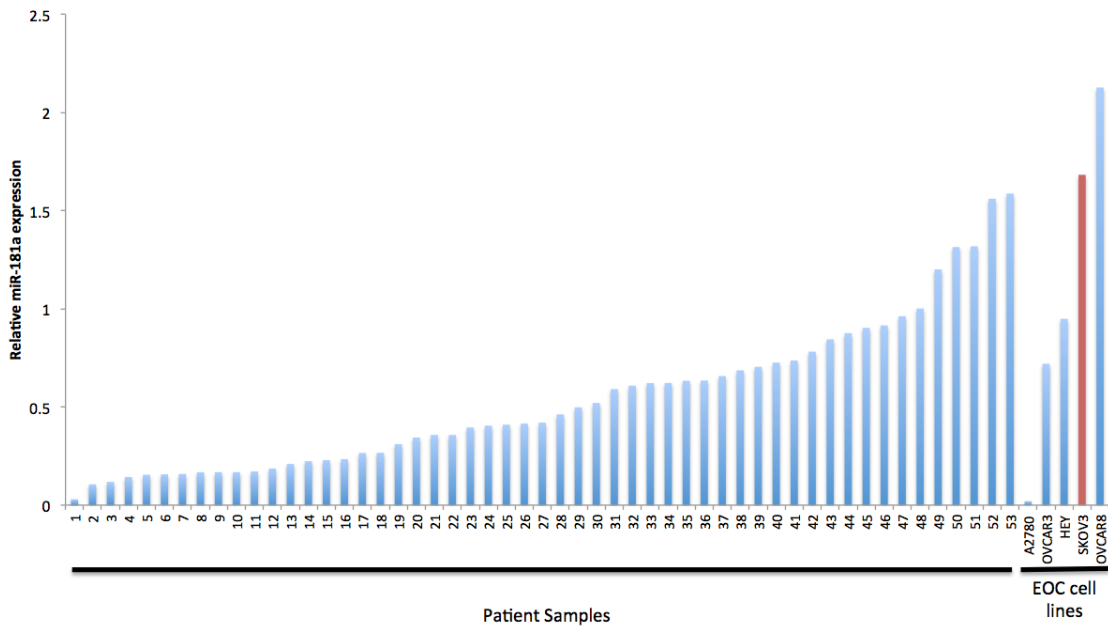

**Supplementary Figure S4 Functional characterization of miR-181a in overexpression cell lines.** The functional activity of miR-181a was monitored via a lentiviral-based mCherry sensor construct containing miR-181a binding sites in the 3'UTR and a control vector without miR-181a binding sites. Both stable cell lines expressing miR-181a revealed a downregulation of mCherry expression (middle panel). Additionally, through Taqman-based qRT-PCR analysis we have also confirmed expression of the mature form of the mutant miR-181a (bottom chart). Student's *t*-test, \*\*\* $P \leq 0.001$  ( $n=3$ ). Error bars: s.d.

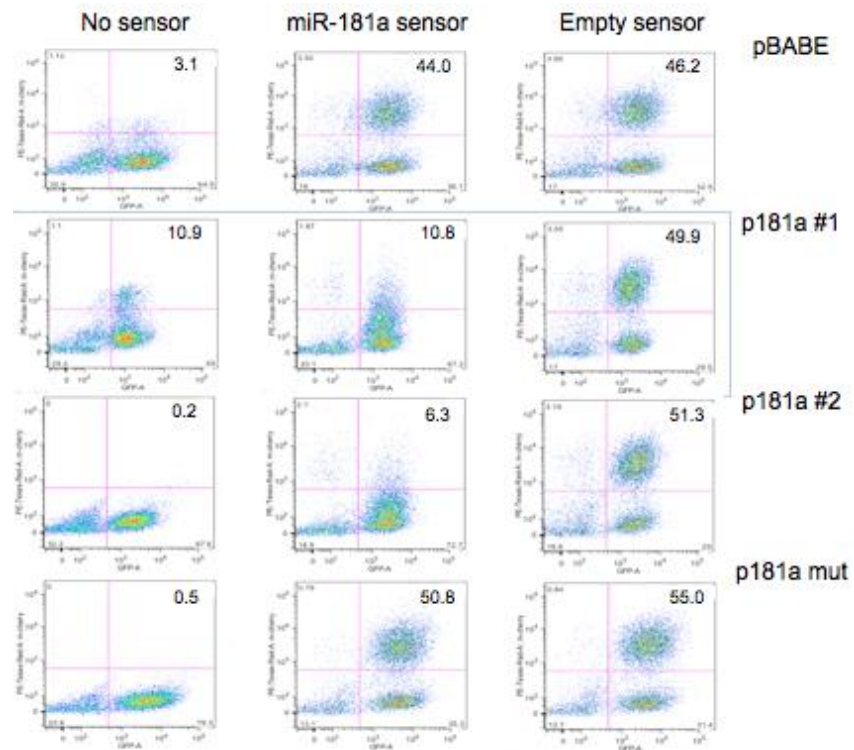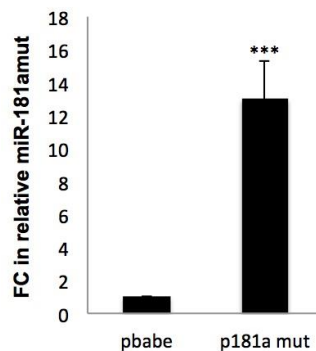

**Supplementary Figure S5 Enhanced expression of miR-181a results in an EMT-like phenotype and increases cellular survival and migration in the HEY serous ovarian adenocarcinoma cell line. (A)** Taqman-based qRT-PCR analysis revealing stable overexpression of miR-181a in the HEY cell line. Student's *t*-test  $*P \leq 0.001$  ( $n=3$ ). Error bars: s.d **(B)** SYBR-based qRT-PCR and western blot analyses show epithelial and mesenchymal marker differences consistent with an EMT-like phenotype in the miR-181a expressing HEY cells. Student's *t*-test  $*P \leq 0.05$ ,  $***P \leq 0.001$  ( $n=3$ ). Error bars: s.d **(C)** miR-181a overexpression increased cellular survival as assessed through the colony formation assay **(D)** and cellular migration measured by wound healing scratch assay (200x, Scale bars (black), 50  $\mu$ M), as well as **(E)** transwell motility assay (200x, Scale bars (white), 50  $\mu$ M), which both reveal that miR-181a enhances cellular motility. Student's *t*-test  $*P \leq 0.05$ ,  $**P \leq 0.01$ ,  $***P \leq 0.001$ . ( $n=3$ ) Error bars: s.d.

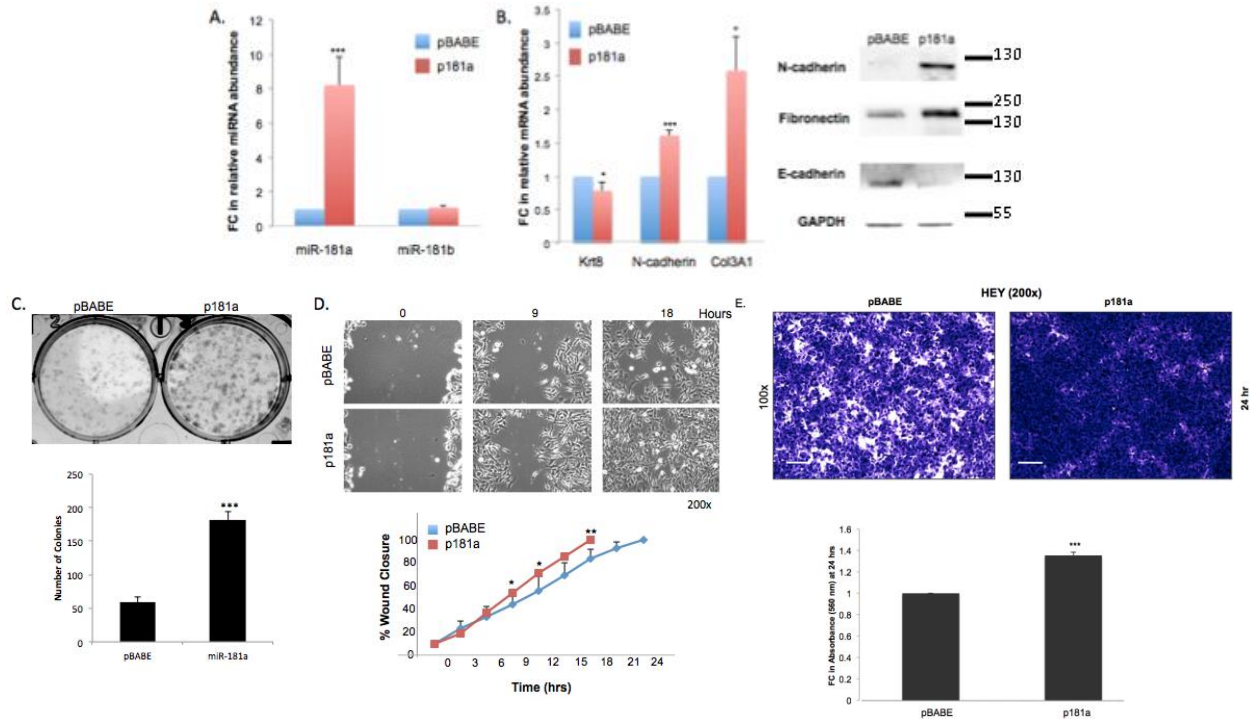

**Supplementary Figure S6 Effects of miR-181a on proliferation.** Cell doubling time in miR-181a-overexpressing and control lines via cell counting. (n=3) Error bars: s.d.

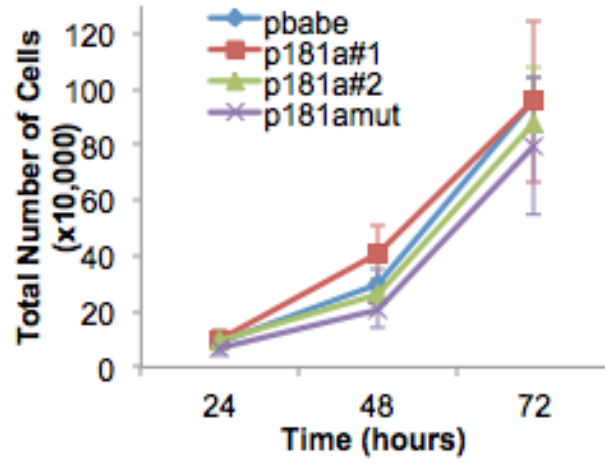

**Supplementary Figure S7 Correlation of miR-181a with EMT markers in patient samples** Pearson correlation between miR-181a and mesenchymal markers (COL5A1, COL3A1) and epithelial markers (E-cadherin) in patient samples. Fibronectin, Analysis of Vimentin and Col6A3 correlation to miR-181a expression shown as well.

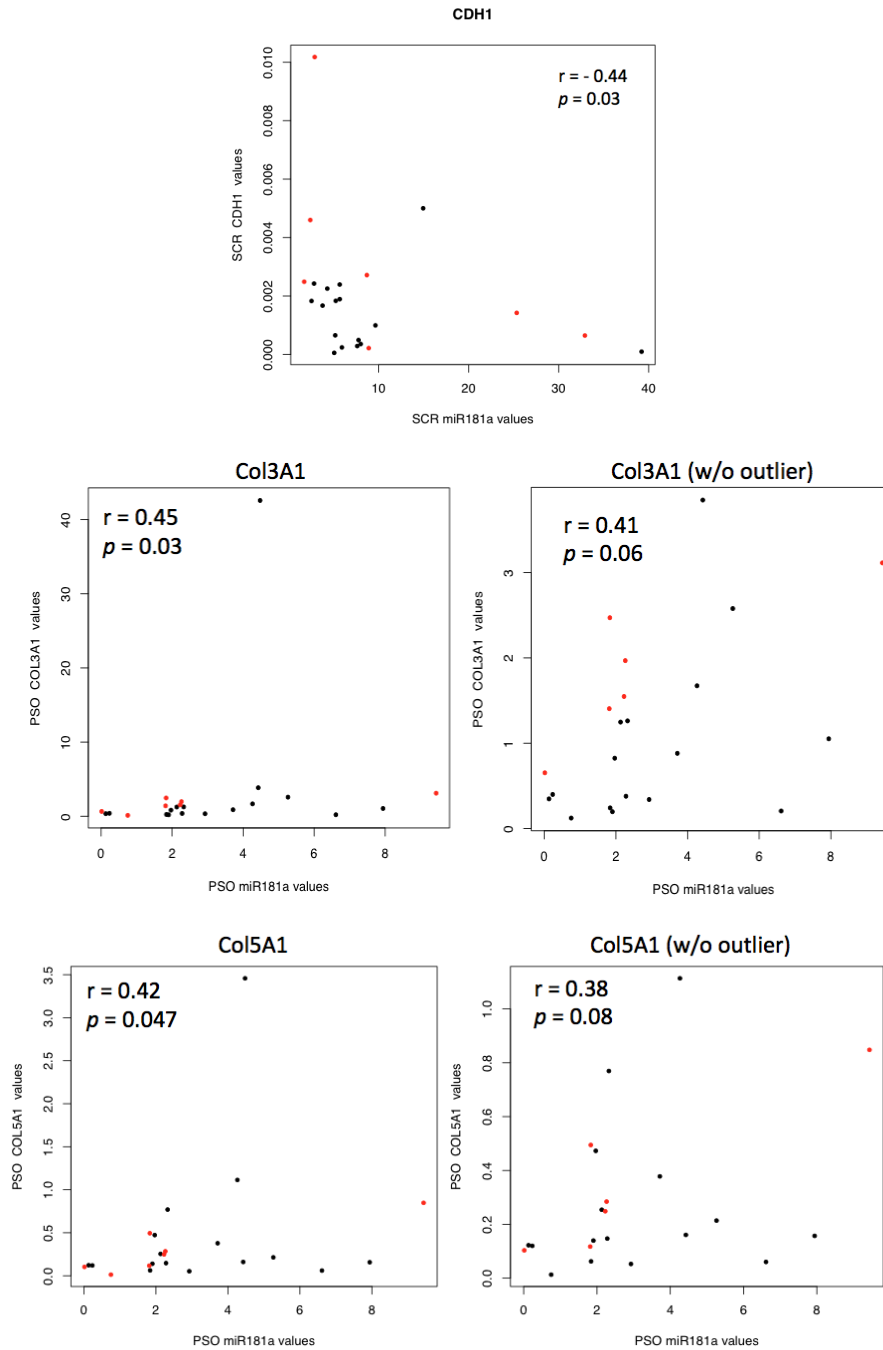

**Supplementary Figure S8 Smad7 expression correlates with patient outcome.** Kaplan-Meier survival curves generated from qRT-PCR analysis of Smad7 expressions in a cohort of high-grade serous ovarian tumors. (p-values were calculated using the Log Rank Mantel Cox test)

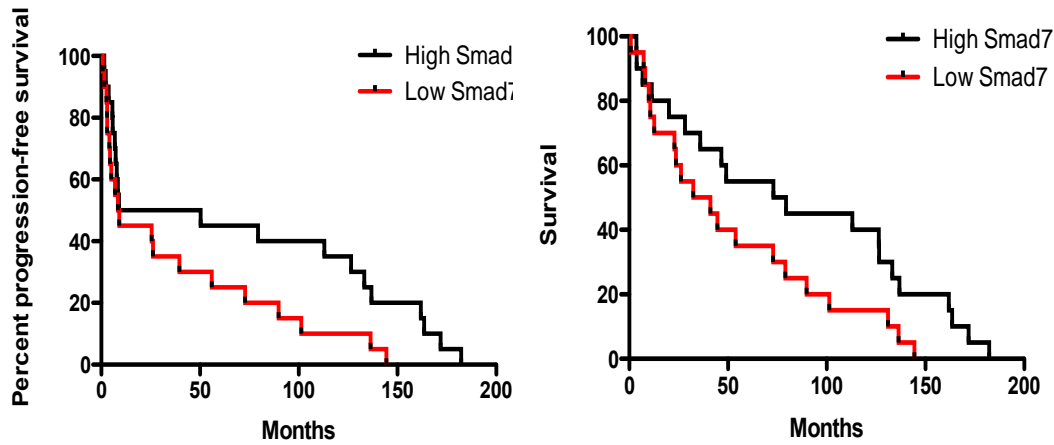

|                                            | <b>Smad7 low</b> | <b>Smad7 high</b> |
|--------------------------------------------|------------------|-------------------|
| Median PFI                                 | 8.7              | 29.6              |
| <b>*P=0.05, OR 3.4; 95% CI: 2.9 to 3.9</b> |                  |                   |
| Median Survival                            | 36.8             | 76.2              |
| <b>*P=0.05, OR 2.1; 95% CI: 1.5 to 2.6</b> |                  |                   |



**Supplementary Figure S9 Smad7 localization in the pBABE and pSmad7 cell lines.**

Immunofluorescence of Smad7 (shown in Texas Red, DAPI for nuclear stain) in the cell lines stably expressing Smad7 reveals that Smad7 is localized in the cytoplasm. (1000x, Scale bar (white), 5  $\mu$ M).

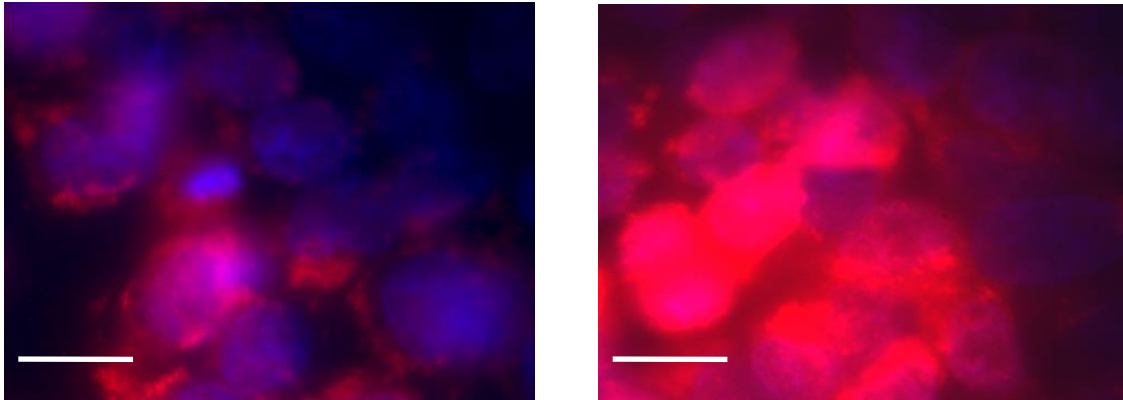

**pBABE**

**1000x**

**pSmad7**

Supplementary Figure S10 Full Scans of Western Blots

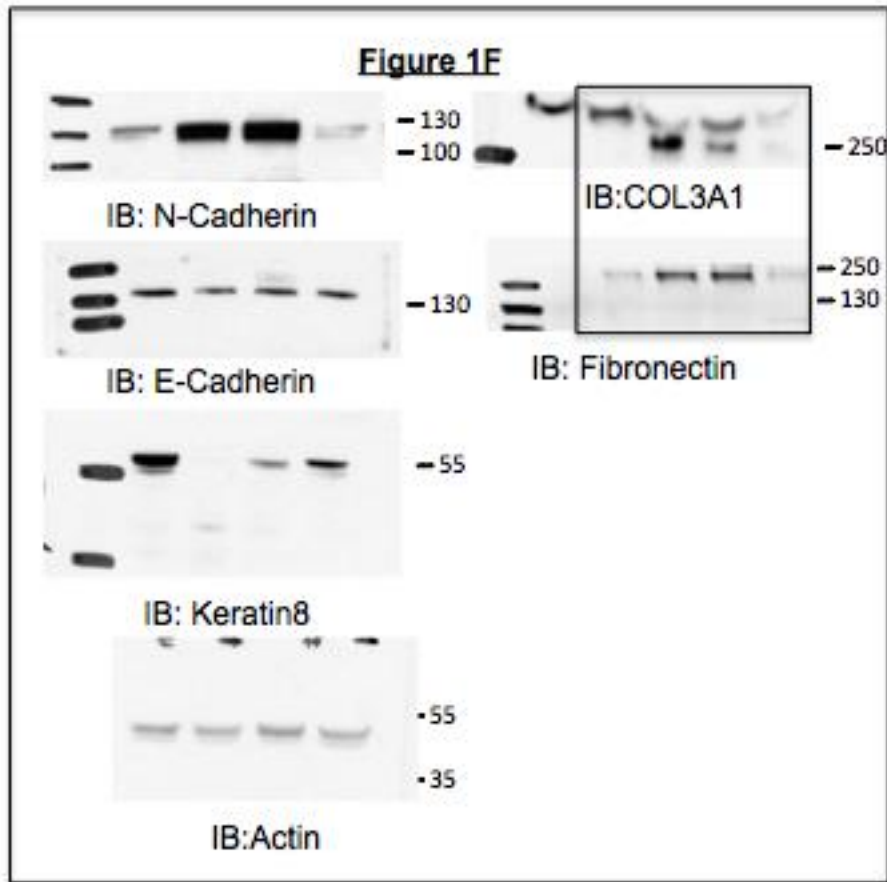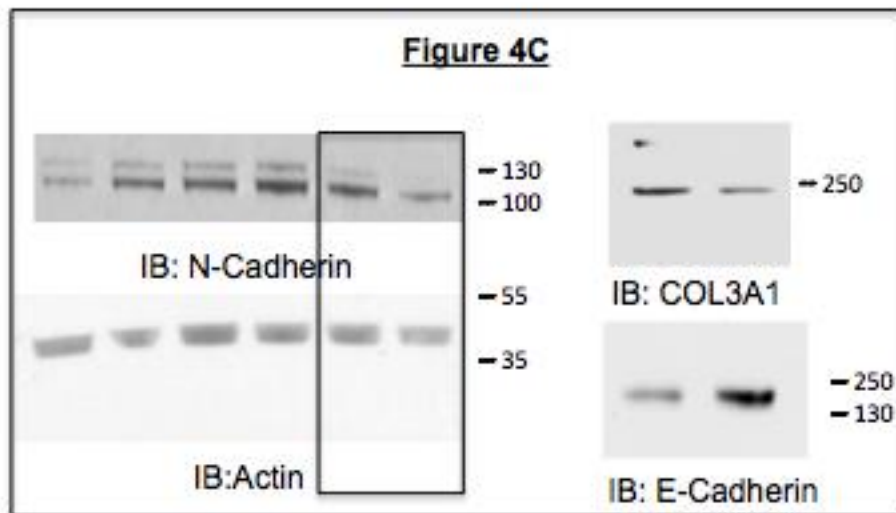

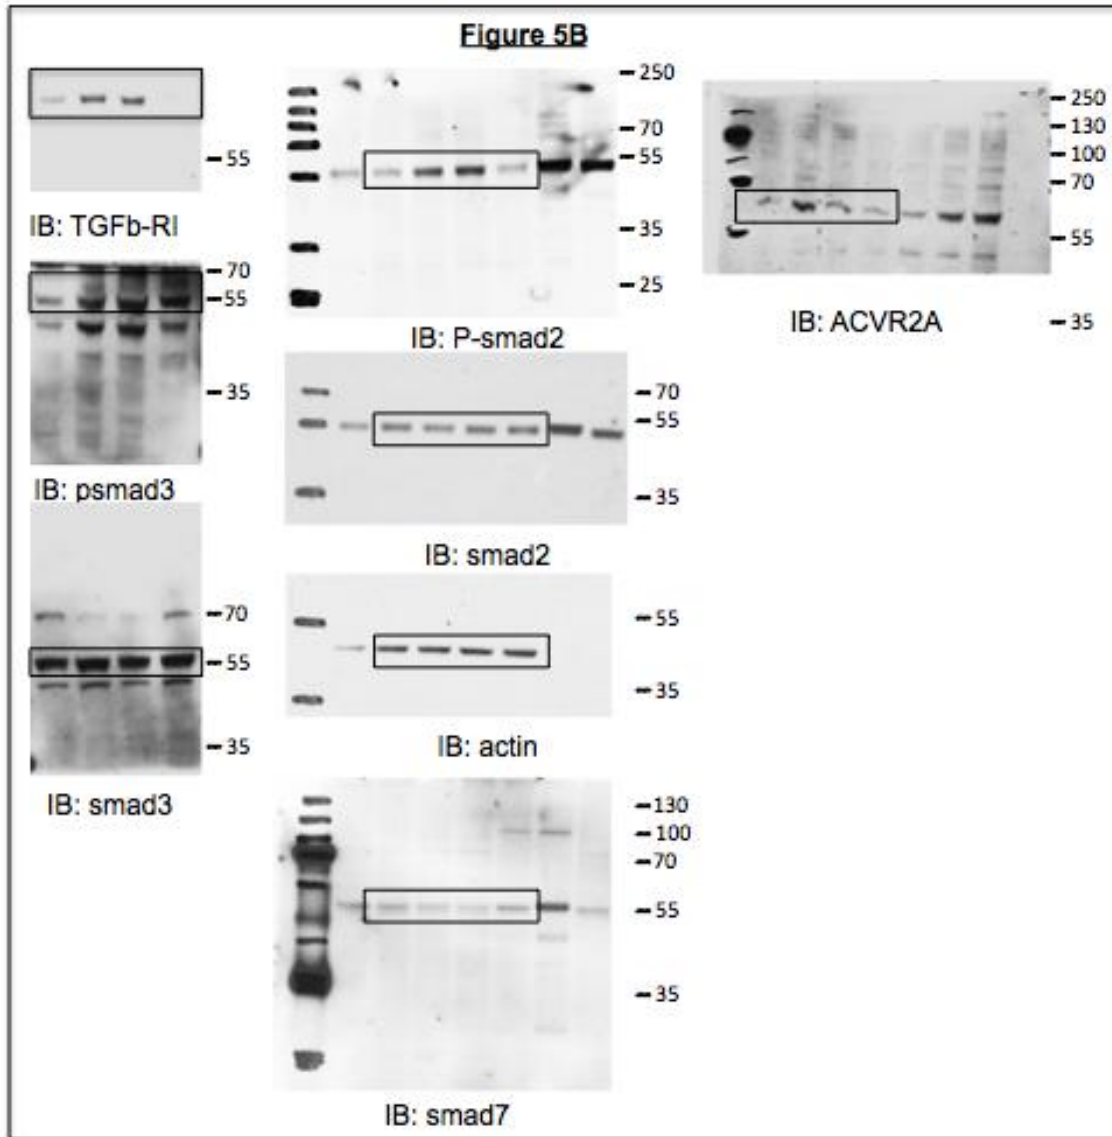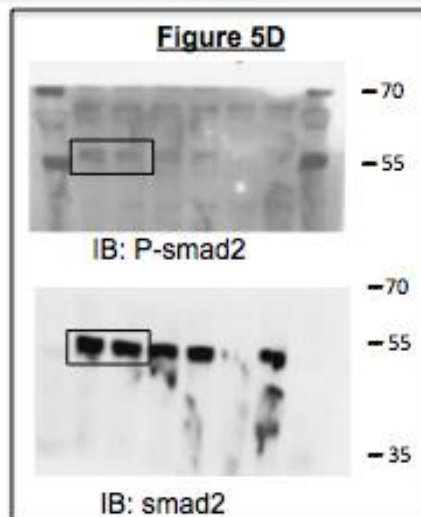

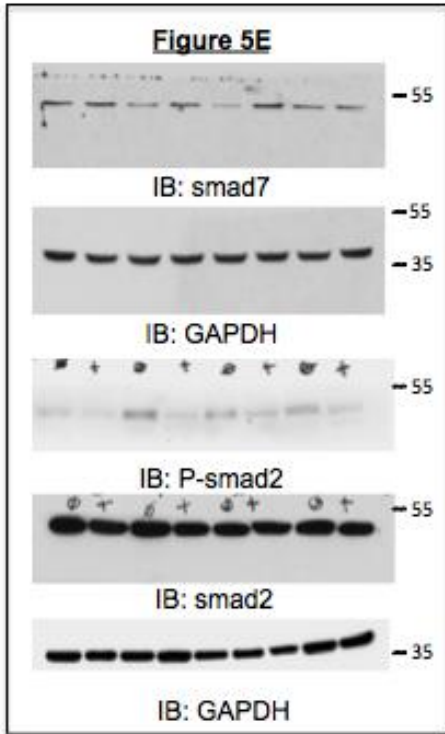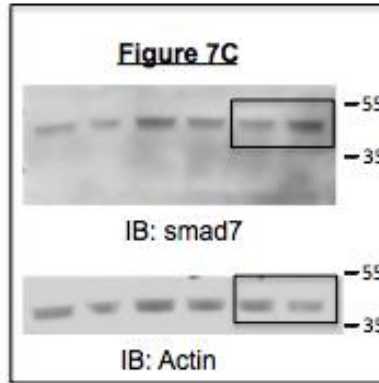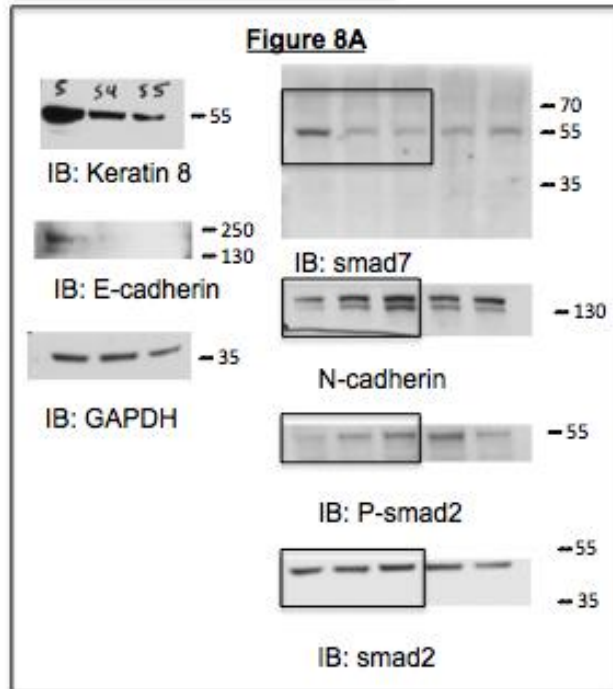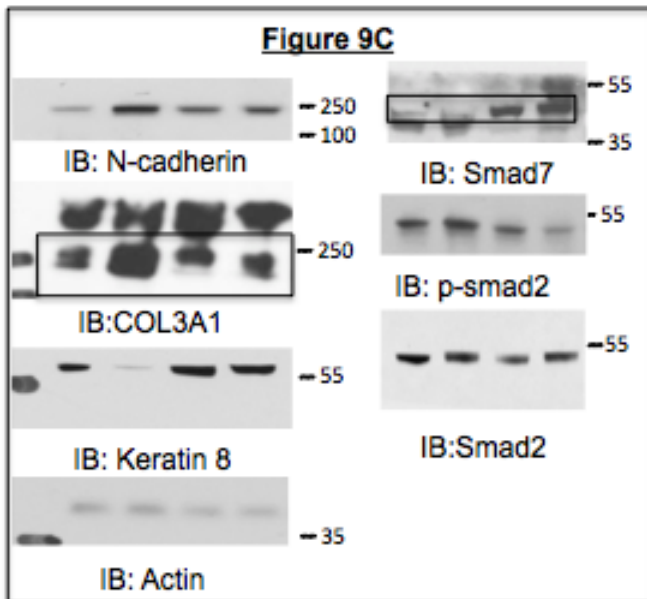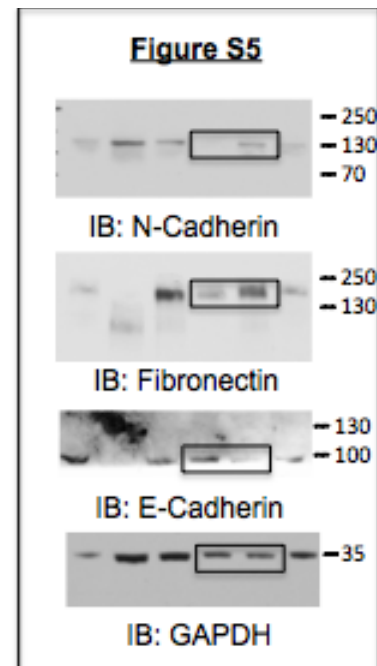

## Supplementary Tables

**Supplementary Table S1:** Clinicopathological characteristic of HGSOC patients with either high or low miR-181a expression. (N= 52)

|                    |     | miR-181a low | miR-181a high |
|--------------------|-----|--------------|---------------|
| Age (yrs.)         |     | 59.7±12.9    | 60.5±13.8     |
| Stage              | III | 26 (100%)    | 26 (100%)     |
| Grade              | 1   | 1 (3.8%)     | 3 (11.5%)     |
|                    | 2   | 5 (19.2%)    | 5 (19.2%)     |
|                    | 3   | 19 (73.0%)   | 15 (57.7%)    |
|                    | 4   | 0 (0%)       | 1 (3.8%)      |
| Ascites volume (L) |     | 3.0±1.9      | 3.0±2.0       |

**Supplementary Table S2.** Summary of survival differences between miR-181a high and low tumours. (p-values were calculated using the Log Rank Mantel Cox test)

|                                              | <b>miR-181a low</b> | <b>miR-181a high</b> |
|----------------------------------------------|---------------------|----------------------|
| Median PFS                                   | 55.9                | 7.1                  |
| <b>**P=0.002, OR 7.8; 95% CI: 7.2 to 8.4</b> |                     |                      |
| Median survival                              | 66.6                | 24.9                 |
| <b>**P=0.002, OR 2.7; 95% CI: 2.1 to 3.3</b> |                     |                      |

**Supplementary Table S3.** Distribution of intraperitoneal nodules (%) in the pBabe and p181a#1 mice and specific sites of metastasis. Fisher Exact Test (\*\* $P < 0.01$ , \* $P < 0.05$ )

| Sites of metastasis | pBabe | p181a#1 |    |
|---------------------|-------|---------|----|
| Peritoneum          | 25%   | 100%    | ** |
| Liver               | 25%   | 60%     |    |
| Diaphragm           | 0%    | 40%     |    |
| Omentum             | 25%   | 100%    | ** |
| Spleen              | 0%    | 60%     | *  |

**Supplementary Table S4.** Summary of mRNA sequencing analysis from A2780 miR-181a overexpressing cells

|         | Total Reads | Max. Reads | Min. Reads | Average Reads | Genes down-regulated $\geq$ 5fold | Genes up-regulated $\geq$ 5fold | Predicted miR181 targets down-regulated $\geq$ 5fold |
|---------|-------------|------------|------------|---------------|-----------------------------------|---------------------------------|------------------------------------------------------|
| pBABE   | 26,240,674  | 99,713     | 15         | 2,281         |                                   |                                 |                                                      |
| p181a#1 | 32,225,698  | 219,630    | 3          | 2,801         | 705                               | 34                              | 49                                                   |



**Supplementary Table S5.** Enhanced miR-181a expression induces global changes in gene expression consistent with TGF- $\beta$  mediated EMT. Exogenous miR-181a expression leads to differential transcriptomic changes of EMT markers, such as downregulation of Keratin 8/18, NUDT13, and others as well as upregulation of Col3A1.

| Gene symbol                           | RefSeq       | Fold Change |
|---------------------------------------|--------------|-------------|
| <b>Genes downregulated during EMT</b> |              |             |
| KRT18*                                | NM_199187    | -5.80       |
| NUDT13                                | NM_015901    | -4.97       |
| OCLN                                  | NM_002538    | -2.16       |
| KRT8*                                 | NM_002273    | -2.02       |
| RGS2                                  | NM_002923    | -1.21       |
| <b>Genes upregulated during EMT</b>   |              |             |
| CDH2*                                 | NM_001792    | 7.3         |
| TIMP1                                 | NM_003254    | 4.6         |
| COL3A1*                               | NM_000090    | 4.0         |
| TGFB2                                 | NM_001135599 | 4.0         |
| SNAI2*                                | NM_003068    | 3.2         |
| ITGAV                                 | NM_001145000 | 2.7         |
| SPARC                                 | NM_003118    | 2.7         |
| COL5A2                                | NM_000393    | 2.2         |
| ITGA5                                 | NM_002205    | 2.1         |
| TGFBR1                                | NM_001130916 | 2.1         |
| TGFBR1                                | NM_004612    | 2.0         |
| VIM*                                  | NM_003380    | 2.0         |
| SNAI3*                                | NM_178310    | 2.0         |
| COL1A2                                | NM_000089    | 1.8         |
| TMEFF1                                | NM_003692    | 1.5         |
| STEAP1                                | NM_012449    | 1.4         |

**Supplementary Table S6.** P-Smad2 expression in advanced ovarian cancer patients negatively correlates with progression-free interval.

| <b>Immune Score</b> | <b>PFI&lt; 6 months</b> | <b>PFI&gt; 6 months</b> |
|---------------------|-------------------------|-------------------------|
| <b>&lt;2</b>        | <b>11</b>               | <b>17</b>               |
| <b>&gt;2</b>        | <b>14</b>               | <b>4</b>                |
| <b>N=</b>           | <b>25</b>               | <b>21</b>               |

**Fisher Exact Test (\*\* $P=0.016$ )**

**Supplementary Table S7.** Summary of survival differences between the p-Smad2 high and low tumours (left panel) and the combined pSmad2/miR-181a high and low tumours. (p-values were calculated using the Log Rank Mantel Cox test)

|                                              | <b>P-Smad2<br/>(I.S. &lt; 2)</b> | <b>P-Smad2<br/>(I.S. ≥ 2)</b> |                                                    | <b>low miR-181a/<br/>low P-Smad2</b> | <b>high miR-181a/<br/>high P-Smad2</b> |
|----------------------------------------------|----------------------------------|-------------------------------|----------------------------------------------------|--------------------------------------|----------------------------------------|
| Median PFS                                   | 53.1                             | 6.7                           | Median PFS                                         | 123.1                                | 6.6                                    |
| * <i>P</i> =0.03, OR 7.9; 95% CI: 7.4 to 8.5 |                                  |                               | *** <i>P</i> =0.0007, OR 18.7; 95% CI: 9.2 to 37.8 |                                      |                                        |
| Median Survival                              | 72.8                             | 25.5                          | Median Survival                                    | 132.2                                | 22.8                                   |
| * <i>P</i> =0.05, OR 2.9; 95% CI: 2.3 to 3.4 |                                  |                               | *** <i>P</i> =0.0006, OR 5.8; 95% CI: 2.6 to 12.8  |                                      |                                        |

**Supplementary Table S8.** Summary of miR-181a expression in primary (PS-O) and recurrent tumours (SCR). (p-values were calculated using the Wilcoxon signed rank test)

| Gene name | Status | All dataset (n = 23)   |      |        | A Group (EMT enriched; n=16) |      |        | B Group (n=7)          |      |       |
|-----------|--------|------------------------|------|--------|------------------------------|------|--------|------------------------|------|-------|
|           |        | Median (IQ-range)      | R    | p      | Median (IQ-range)            | R    | p      | Median (IQ-range)      | R    | p     |
| miR-181a  | PS-O   | 2.263<br>(1.831-4.425) | 2.51 | 0.0024 | 2.626<br>(1.919-4.464)       | 2.16 | 0.0006 | 1.831<br>(0.750-2.263) | 4.74 | 0.063 |
|           | SCR    | 5.685<br>(3.774-8.904) |      |        | 5.682<br>(4.492-7.953)       |      |        | 8.695<br>(2.410-25.34) |      |       |

**Supplementary Table S9.** Main clinicopathological features of EOC patients enrolled in the study from which biopsies were taken at primary surgery (PS-O) and at time of relapse (SCR)

| Clinicopathologic Variable |                     | Overall (n=23)     |
|----------------------------|---------------------|--------------------|
| <b>Age (years)</b>         | <i>Median Range</i> | 55.4 (28.5 - 72.2) |
| <b>Stage</b>               |                     |                    |
|                            | <b>III</b>          | 21 (91.3%)         |
| <i>Sub-stage</i>           | b                   | 3 (14.3%)          |
|                            | c                   | 18 (85.7%)         |
|                            | <b>IV</b>           | 2 (8.7%)           |
| <b>Grade</b>               |                     |                    |
|                            | 1                   | 4 (17.4 %)         |
|                            | 2                   | 3 (13.0%)          |
|                            | 3                   | 16 (69.6)          |
| <b>Histotype</b>           |                     |                    |
|                            | Serous              | 18 (78.3%)         |
|                            | Endometrioid        | 3 (13.1%)          |
|                            | Undifferentiated    | 0                  |
|                            | Clear cell          | 1 (4.3%)           |
|                            | Other               | 1 (4.3%)           |
